# Supplementary material for: Conspiracy Beliefs, Rejection of Vaccination, and Support for hydroxychloroquine: A Conceptual Replication-Extension in the COVID-19 Pandemic Context
Source: PubMed Central journal article supplement (PMC7536556; doi:10.3389/fpsyg.2020.565128), 2020-09-18
Supplement: Table_1.pdf [file Table_1.pdf]

## Supplementary Analysis

### Study 1

**Table 1.**

*Geographic distribution for Study 1*

| <i>Locality</i>            | <i>N</i>    |
|----------------------------|-------------|
| Auvergne-Rhône-Alpes       | 20 (4.8%)   |
| Bourgogne-France-Comté     | 1 (0.2%)    |
| Bretagne                   | 52 (12.7%)  |
| Centre-Val de Loire        | 3 (0.7%)    |
| Corse                      | 3 (0.7%)    |
| Grand Est                  | 4 (0.9%)    |
| Hauts-de-France            | 4 (0.9%)    |
| Îles-de-France             | 30 (7.3%)   |
| Normandie                  | 16 (3.9%)   |
| Nouvelle-Aquitaine         | 9 (2.2%)    |
| Occitanie                  | 7 (1.7%)    |
| Pays de la Loire           | 17 (4.1%)   |
| Provence-Alpes-Côte d'Azur | 231 (57.9%) |
| Régions d'Outre-mer        | 3 (0.7%)    |
| Other                      | 9 (2.2%)    |

**Table 2.***Factor loadings for exploratory Factor Analyses of COVID-19 conspiracy beliefs*

|                              | Factor 1 | Factor 2 |
|------------------------------|----------|----------|
| 1. Chinese bioweapon         | .84      |          |
| 2. Chinese economic crisis   | .88      |          |
| 3. Chinese failure           | .76      |          |
| 4. Hidden vaccine            | .58      |          |
| 5. Industrialist strategy    |          | .47      |
| 6. Eugenics motives          | .77      |          |
| 7. French pension reform     |          | .63      |
| 8. French government laxity  |          | .68      |
| 9. French municipal election |          | .81      |

*Note.* Using Oblimin rotation.

## Study 2

**Table 3.**

*Distribution of the education*

| High school | College  | Bachelor's degree | Master's degree | Doctoral degree | Other    | Missing  |
|-------------|----------|-------------------|-----------------|-----------------|----------|----------|
| 0.7 %       | 14.6 %   | 58.3 %            | 15.9%           | 2.2 %           | 2.7 %    | 5.3 %    |
| (N = 3)     | (N = 58) | (N = 231)         | (N = 63)        | (N = 9)         | (N = 11) | (N = 21) |

**Table 4.**

*Factor loadings for exploratory Factor Analyses of COVID-19 and chloroquine conspiracy beliefs*

|                                            | <b>Factor 1</b> | <b>Factor 2</b> | <b>Factor 3</b> |
|--------------------------------------------|-----------------|-----------------|-----------------|
| 1. Chinese bioweapon                       | 0.933           |                 |                 |
| 2. Chinese economic crisis                 | 0.938           |                 |                 |
| 3. Chinese failure                         | 0.587           |                 |                 |
| 4. Hidden vaccine                          | 0.556           |                 |                 |
| 5. Industrialist strategy                  |                 |                 | 0.495           |
| 6. Eugenics motives                        | 0.734           |                 |                 |
| 7. Pasteur Institute                       | 0.506           |                 |                 |
| 8. French pension reform                   |                 |                 | 0.758           |
| 9. French government laxity                |                 |                 | 0.794           |
| 10. French municipal election              |                 |                 | 0.639           |
| 11. Chloroquine financial conflict         |                 | 0.859           |                 |
| 12. Chloroquine media bashing              |                 | 0.785           |                 |
| 13. Chloroquine government                 |                 | 0.583           |                 |
| 14. Chloroquine prescription               |                 | 0.722           |                 |
| 15. Pharmaceutical industry and scientists |                 | 0.818           |                 |

Note. Using Oblimin rotation.
